# Supplementary figures and images for: The DEG/ENaC cation channel protein UNC-8 drives activity-dependent synapse removal in remodeling GABAergic neurons
Source: eLife journal article supplement (doi:10.7554/elife.14599), 2016-07-12

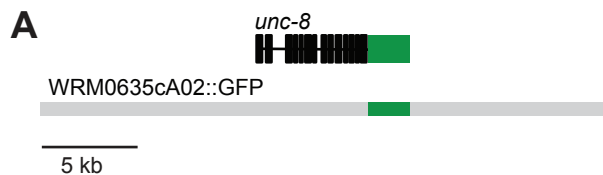

**B wild type L1/L2 Animal**

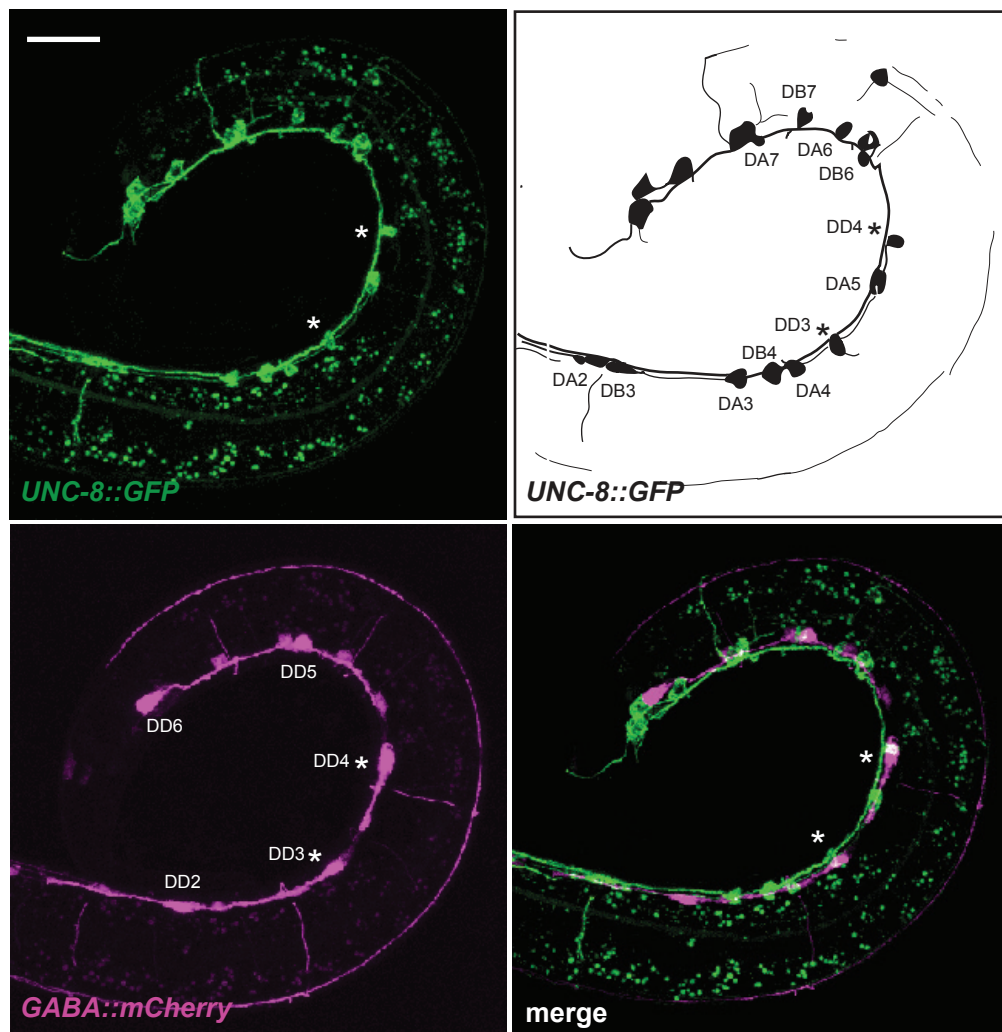

**C Adult *unc-55***

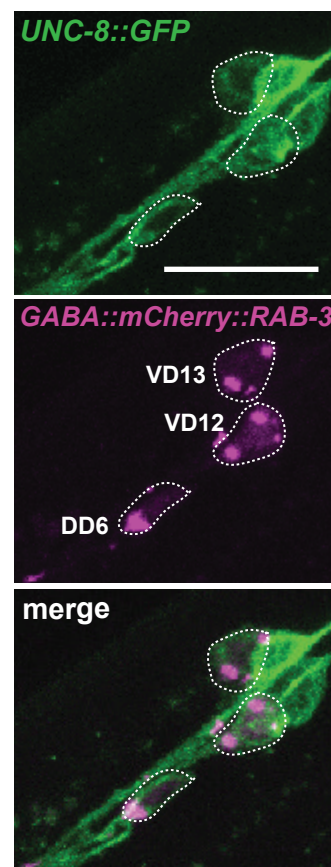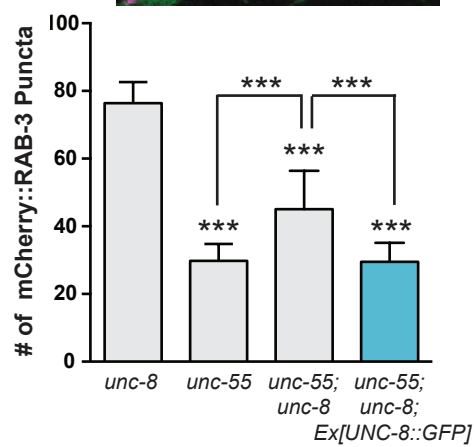

Supplement: supp [file elife_poa_e14599_Figure_1_figure_supplement_1.pdf › elife_poa_e14599_Figure_1_figure_supplement_1.pdf]

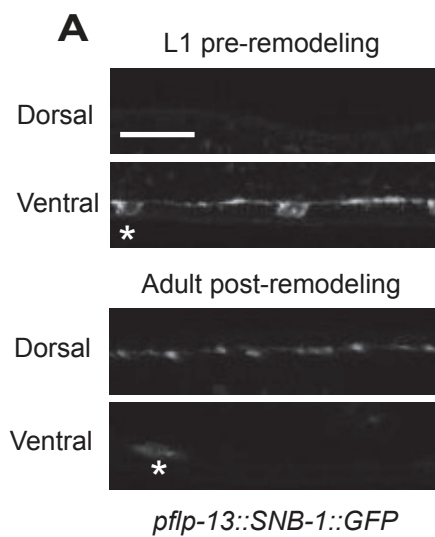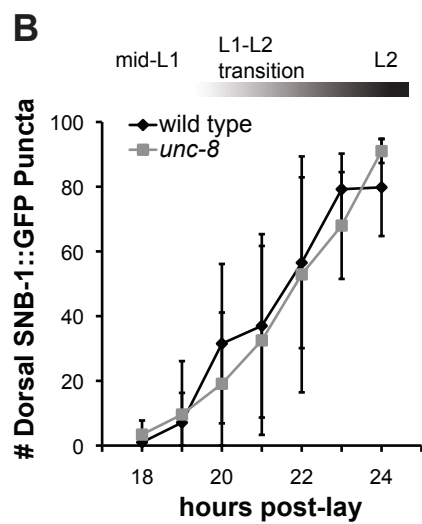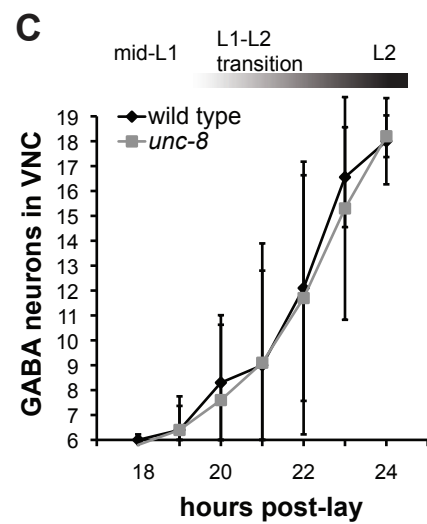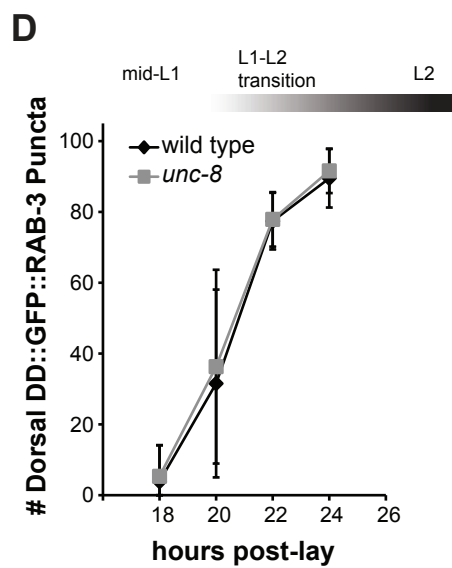

Supplement: supp [file elife_poa_e14599_Figure_2_figure_supplement_1.pdf › elife_poa_e14599_Figure_2_figure_supplement_1.pdf]

**A**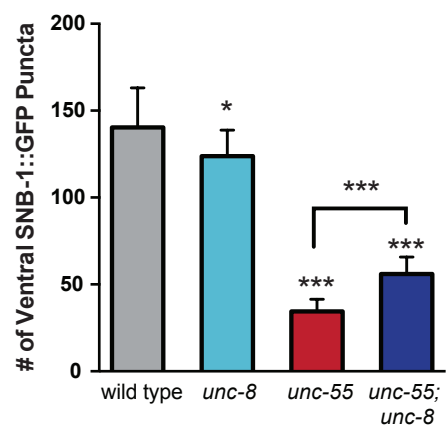**B**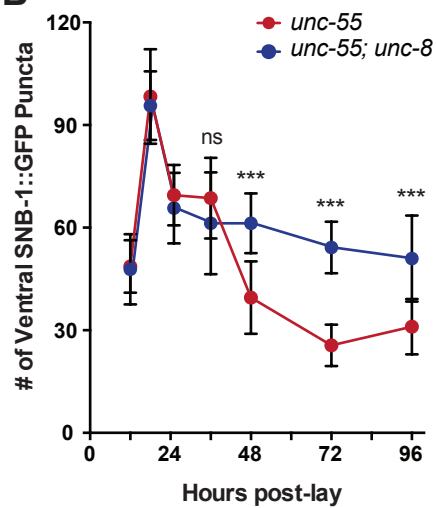**C****Ventral Puncta Distribution**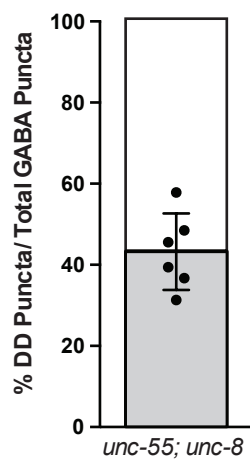

Supplement: supp [file elife_poa_e14599_Figure_3_figure_supplement_1.pdf › elife_poa_e14599_Figure_3_figure_supplement_1.pdf]

**A**

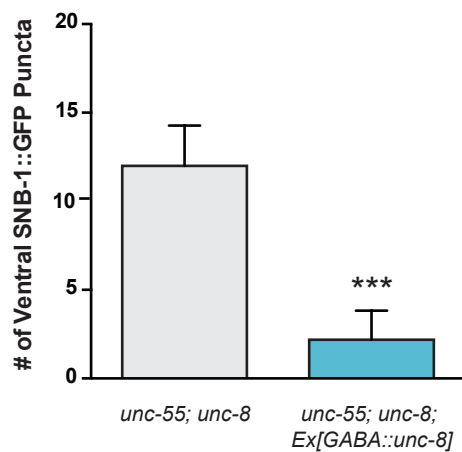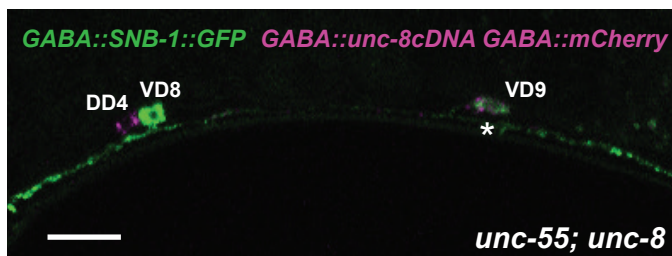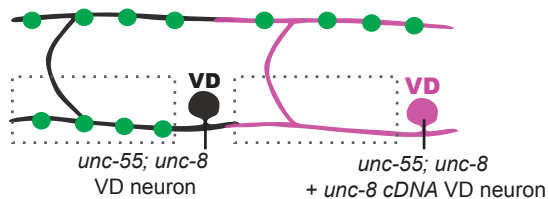

**B**

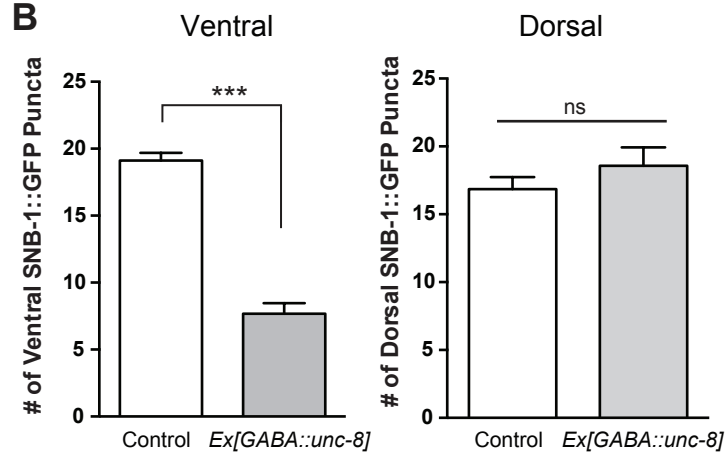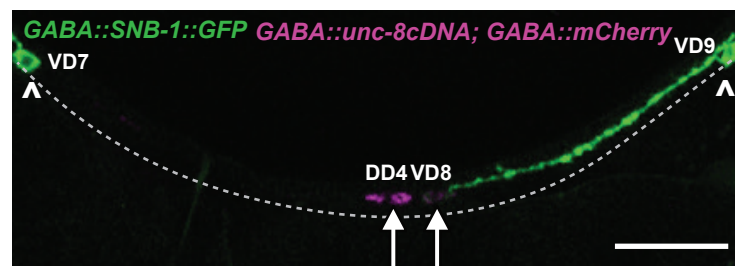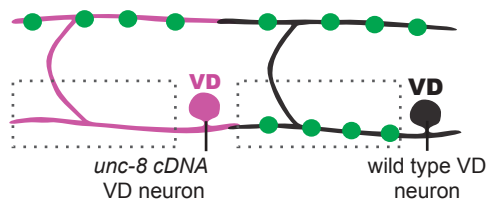

Supplement: supp [file elife_poa_e14599_Figure_3_figure_supplement_2.pdf › elife_poa_e14599_Figure_3_figure_supplement_2.pdf]

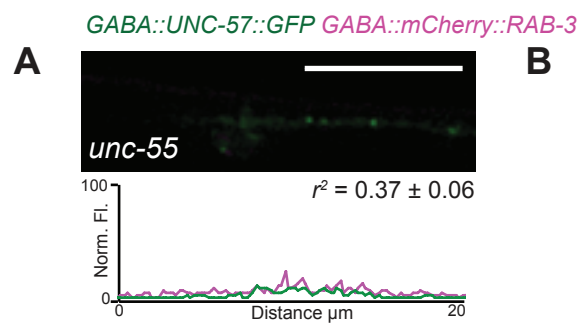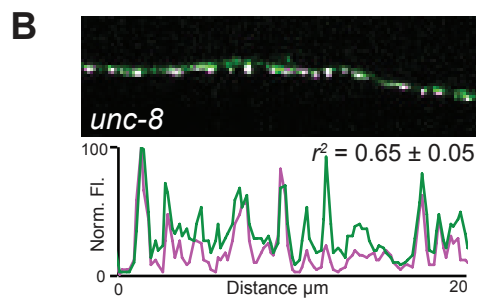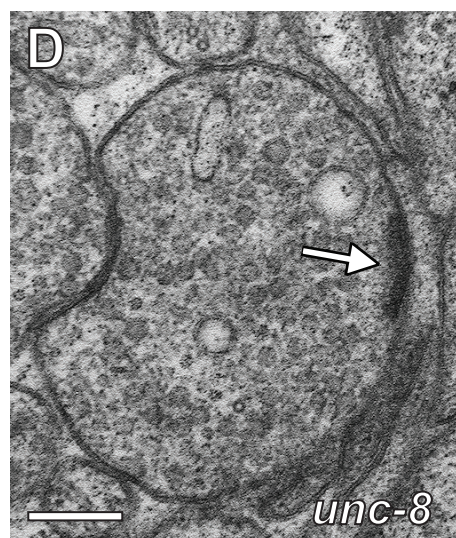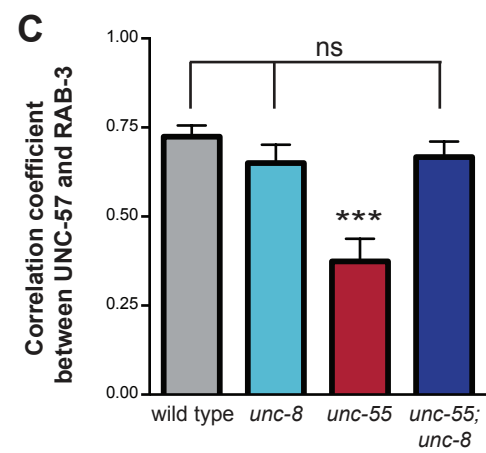

Supplement: supp [file elife_poa_e14599_Figure_4_figure_supplement_1.pdf › elife_poa_e14599_Figure_4_figure_supplement_1.pdf]

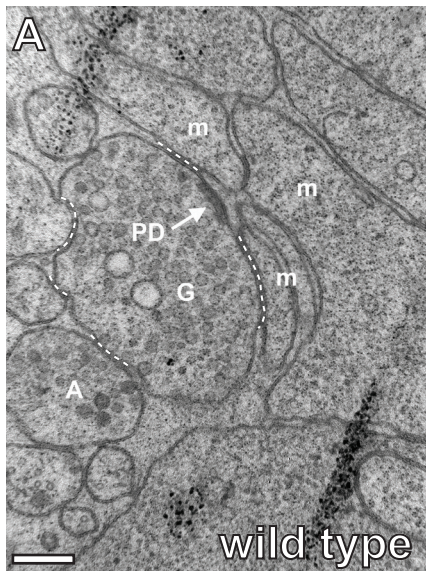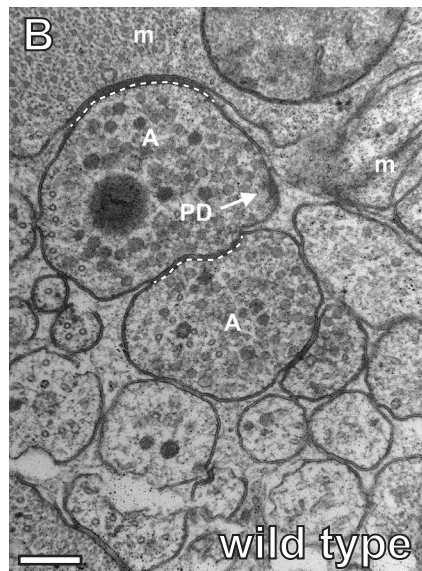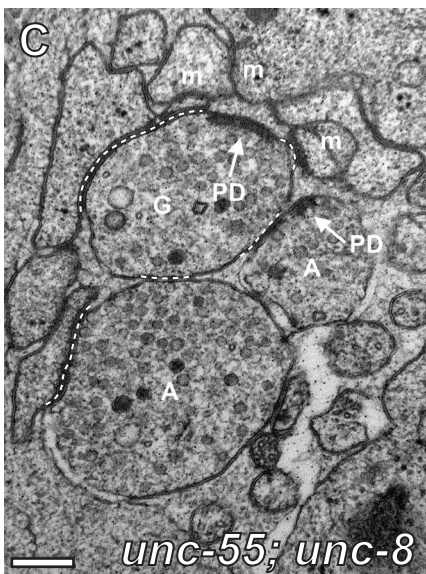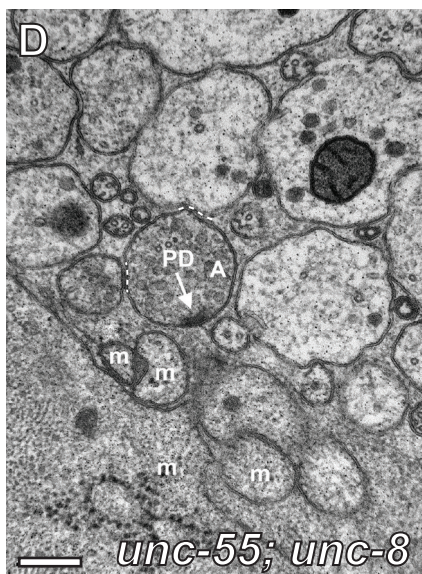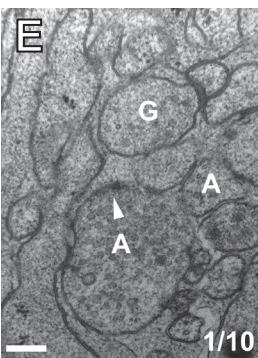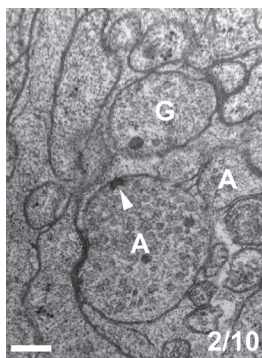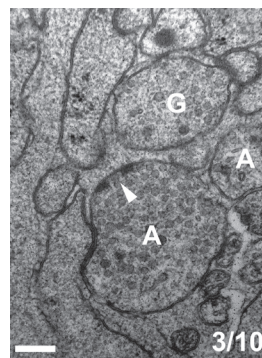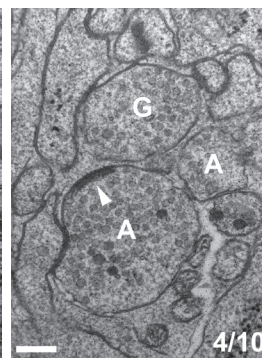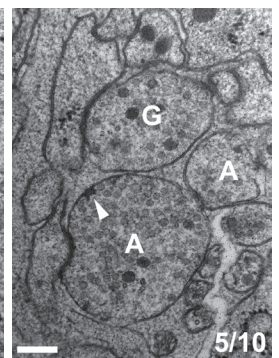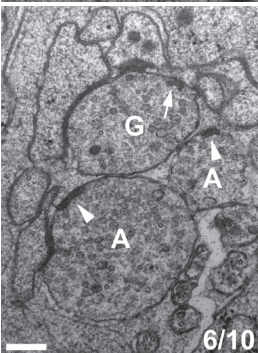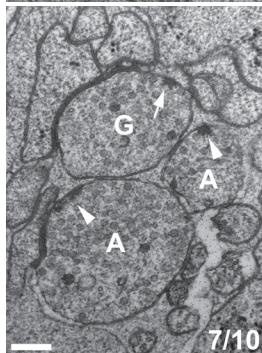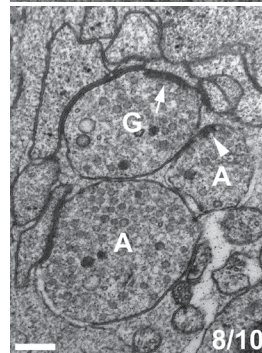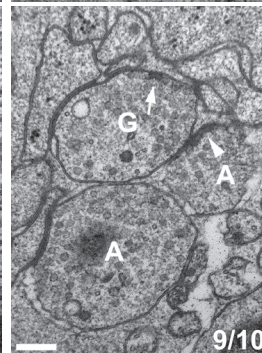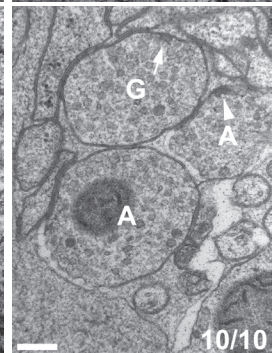

Supplement: supp [file elife_poa_e14599_Figure_4_figure_supplement_2.pdf › elife_poa_e14599_Figure_4_figure_supplement_2.pdf]

## A Pre-Remodeling

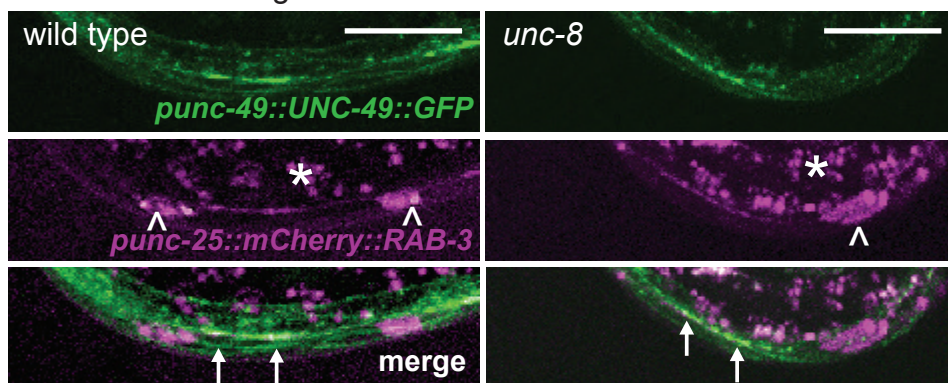

## B Pre-Remodeling

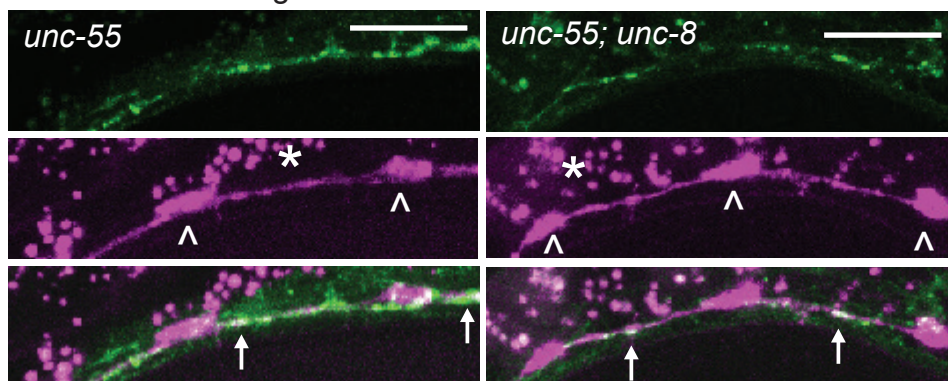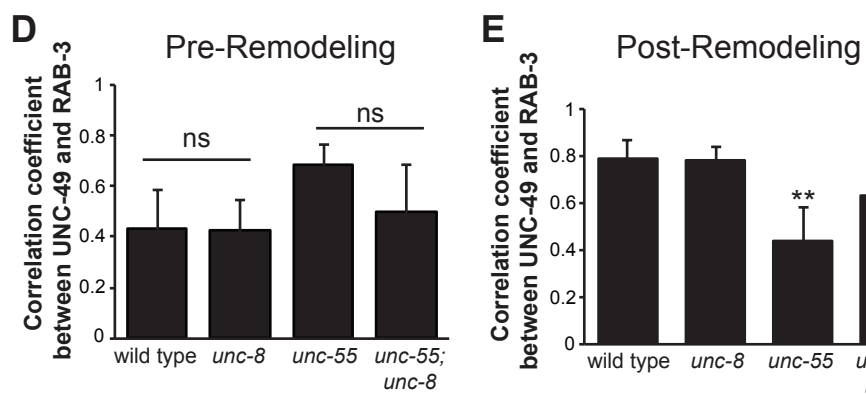

## C Post-Remodeling

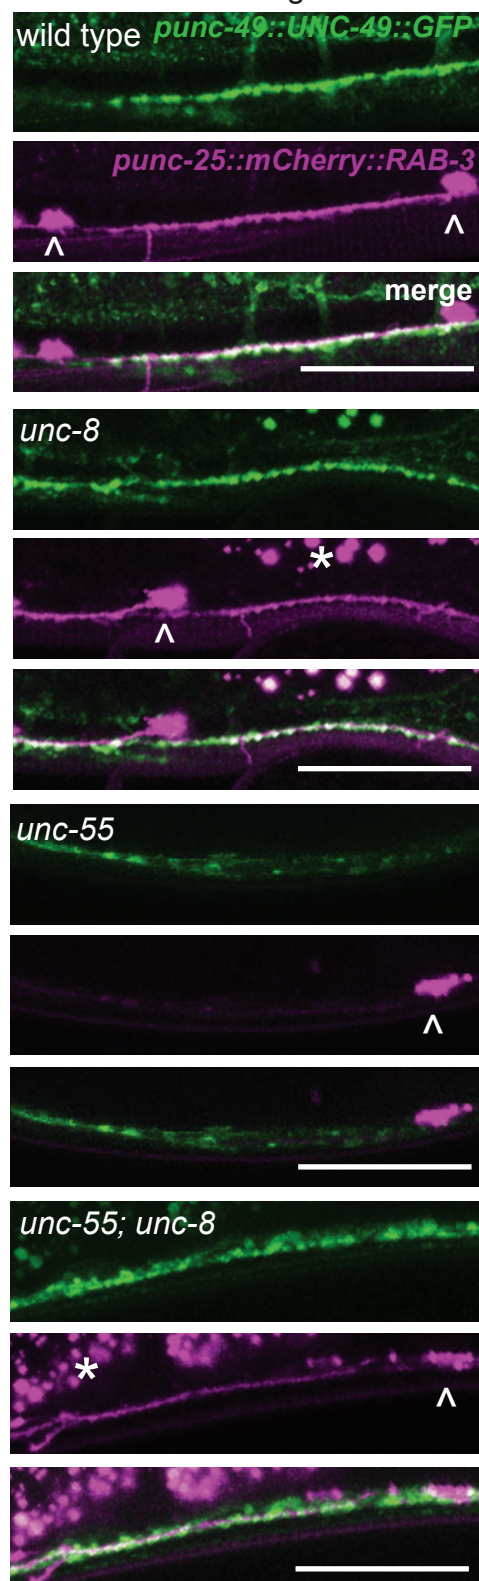

Supplement: supp [file elife_poa_e14599_Figure_4_figure_supplement_3.pdf › elife_poa_e14599_Figure_4_figure_supplement_3.pdf]

**A**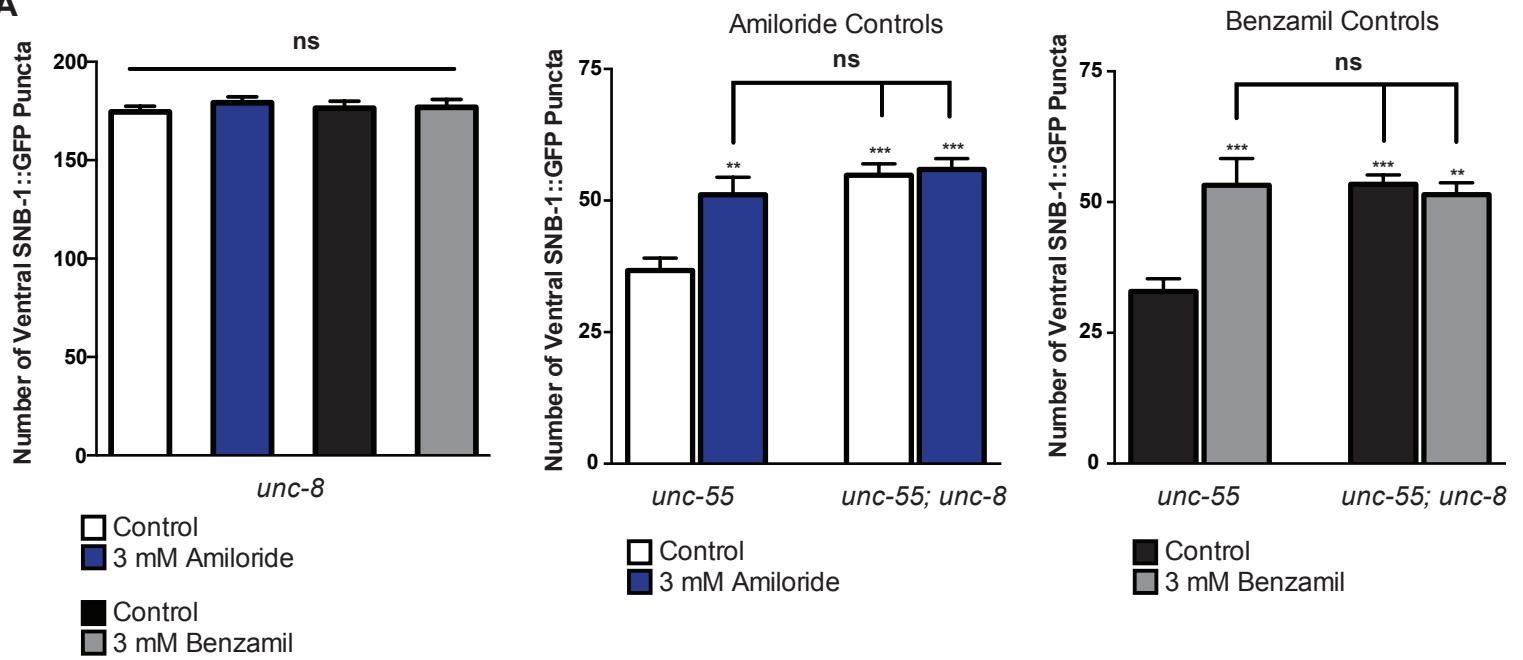**B**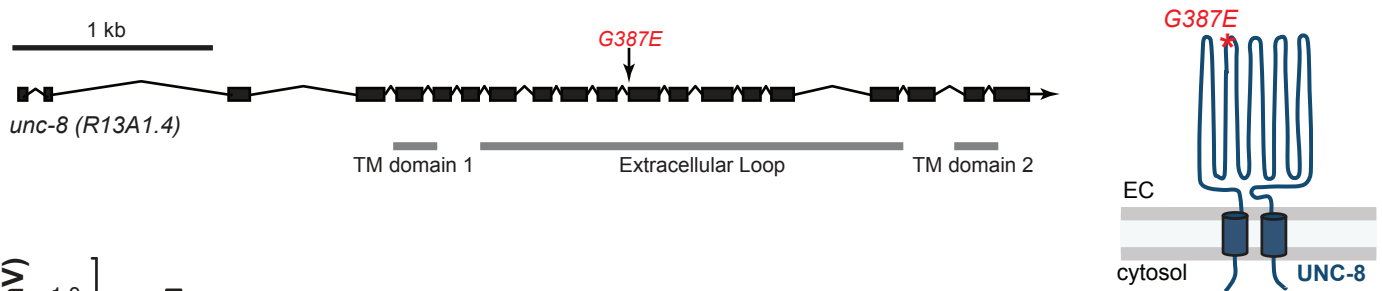**C**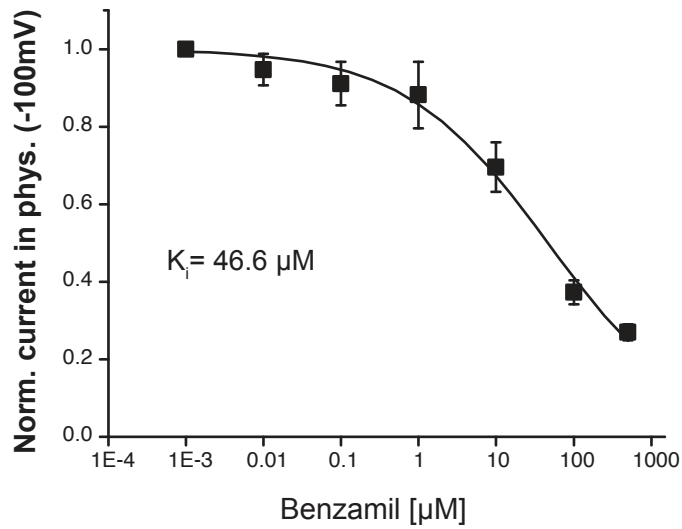

Supplement: supp [file elife_poa_e14599_Figure_5_figure_supplement_1.pdf › elife_poa_e14599_Figure_5_figure_supplement_1.pdf]
